# Supplementary material for: Binucleating Jäger-type {(N2O2)2}4− ligands: magnetic and electronic interactions of Fe(ii), Ni(ii) and Cu(ii) across an in-plane TTF-bridge
Source: Royal Society of Chemistry journal article supplement (doi:10.1039/d4dt00479e), 2024-01-01
Supplement: d4dt00479e1.pdf [file d4dt00479e1.pdf]

---

**Supporting Information for**  
**Binucleating Jäger-type  $\{(N_2O_2)_2\}^{4-}$  ligands: Magnetic and electronic interactions of Fe(II), Ni(II) and Cu(II) across an in-plane TTF-bridge**

Constantin Schreck,<sup>a</sup> Sophie Schönfeld,<sup>a†</sup> Phil Liebing,<sup>b</sup> Gerald Hörner<sup>b</sup> and  
Birgit Weber<sup>\*b</sup>

---

<sup>a.</sup> *Department of Chemistry, Inorganic Chemistry IV, University of Bayreuth, 95447 Bayreuth, Germany.*

<sup>b.</sup> *Institute for Inorganic and Analytical Chemistry, Faculty of Chemistry and Earth Sciences, Friedrich-Schiller-University Jena, Germany.*

† Present Address: Fraunhofer Institute for Environmental, Safety and Energy Technology UMSICHT, Institute Branch Sulzbach-Rosenberg, Department Renewable Energy, 92237 Sulzbach Rosenberg.

$^1\text{H-NMR}$  spectra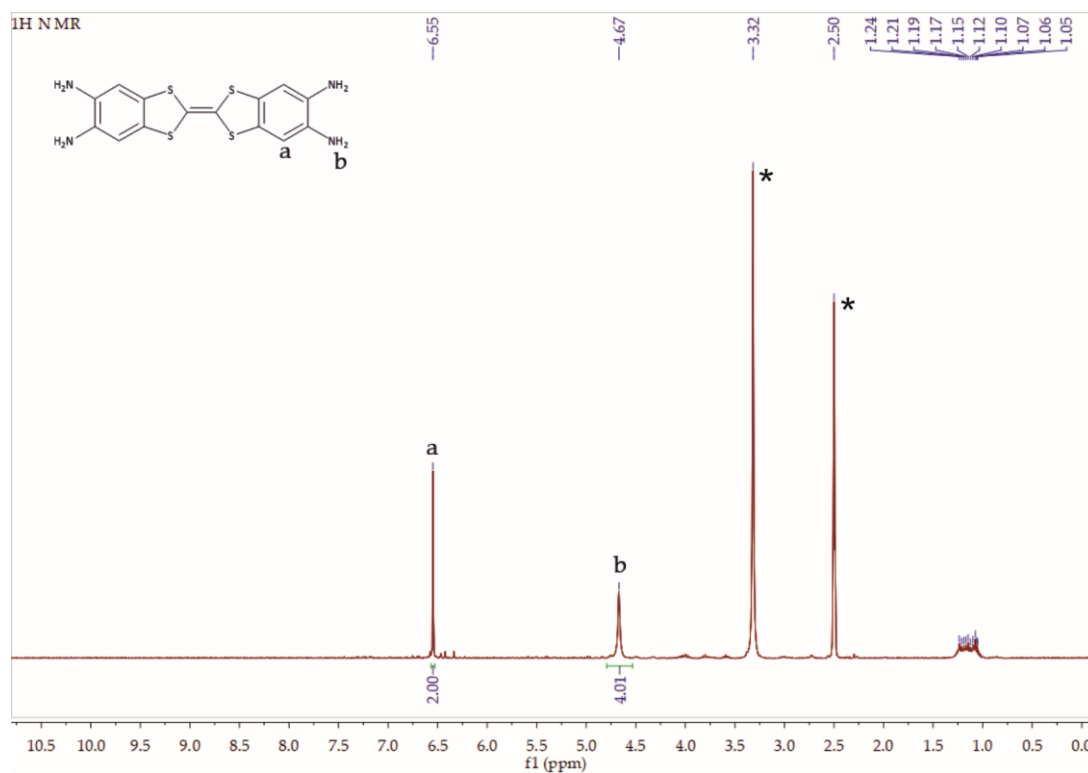

Figure S1:  $^1\text{H-NMR}$  spectrum of ligand precursor **2** in  $\text{dms0-d}_6$  (300 MHz) with signal assignments. Solvent signals are marked with \*.

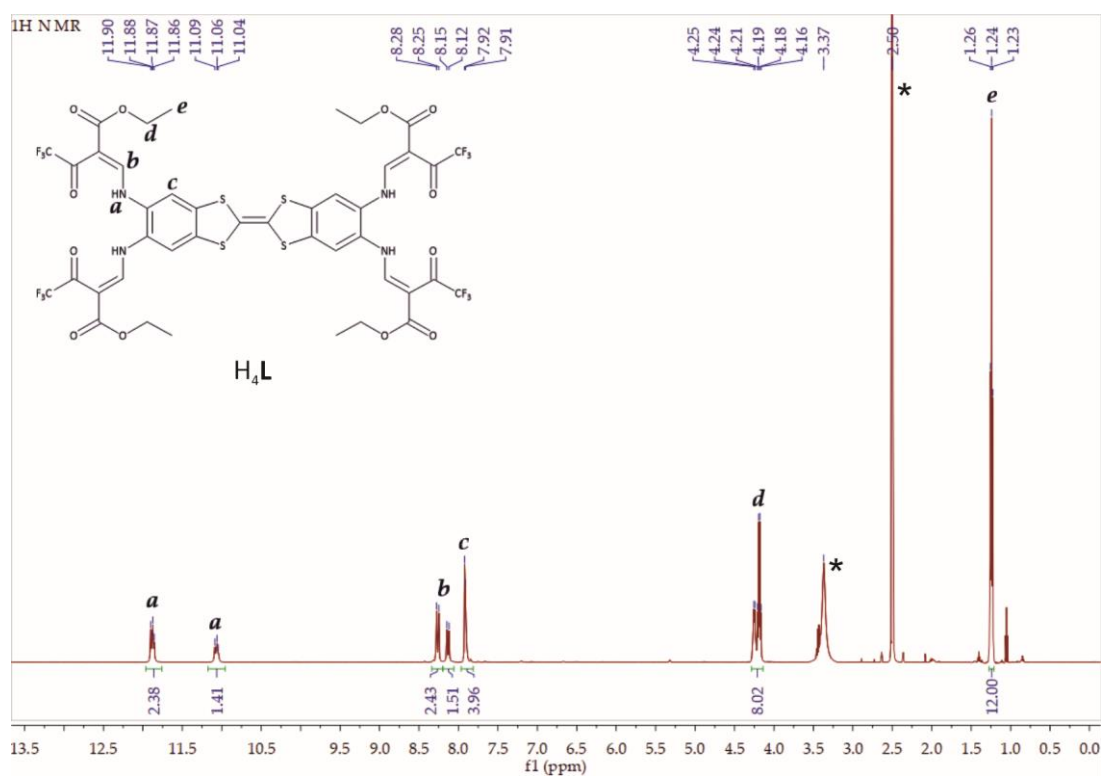

Figure S2:  $^1\text{H-NMR}$  spectrum of ligand  $\text{H}_4\text{L}$  in  $\text{dms0-d}_6$  (500 MHz) with signal assignments. Solvent signals are marked with \*.

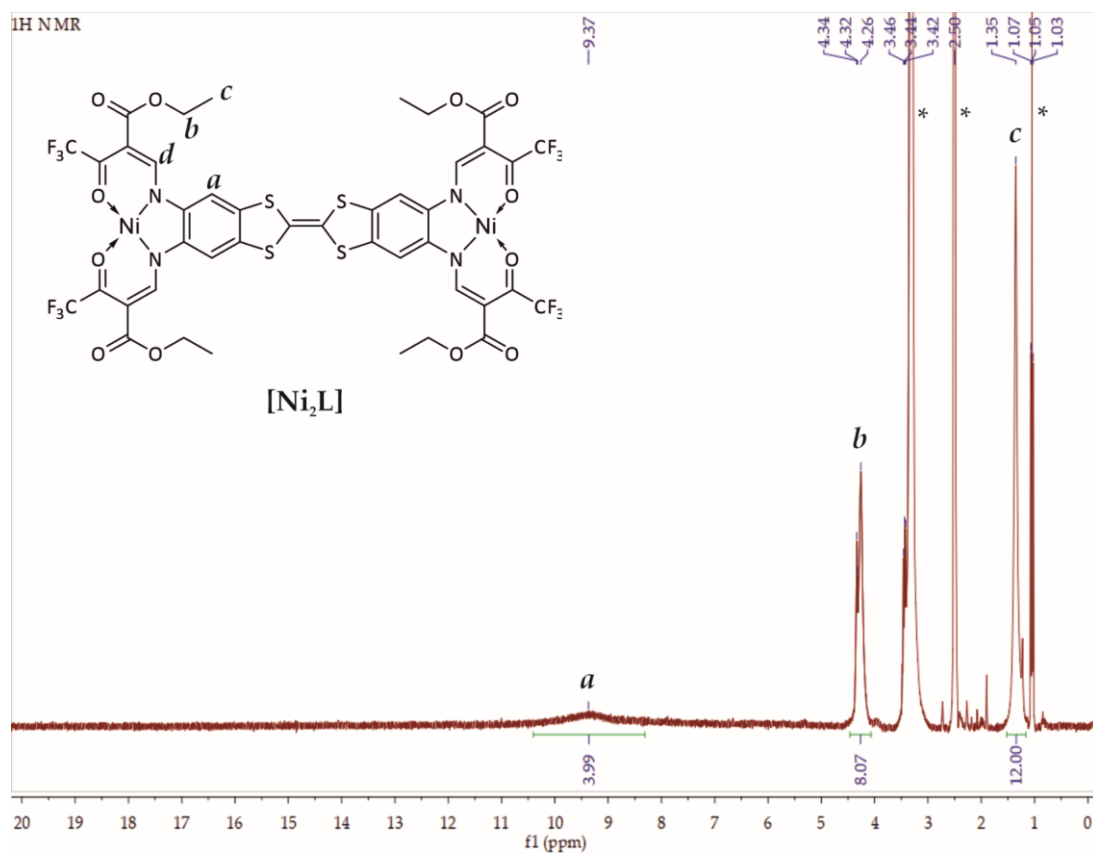

Figure S3: <sup>1</sup>H-NMR spectrum of **[Ni<sub>2</sub>L]** in dms0-d<sub>6</sub> (500 MHz) with signal assignments. Solvent signals (dms0, H<sub>2</sub>O and EtOH) are marked with \*.

## Mass spectrum

ESI neg: H<sub>4</sub>L in MeCN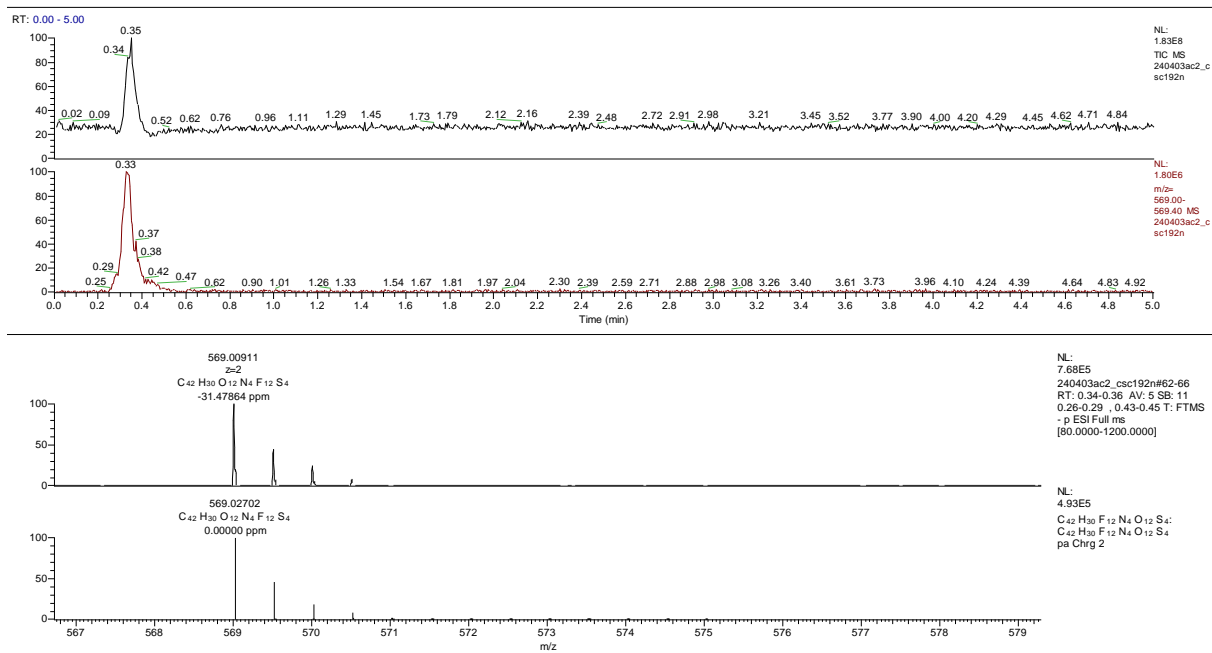Figure S 4: Mass spectrum of H<sub>4</sub>L in MeCN.

## IR spectra

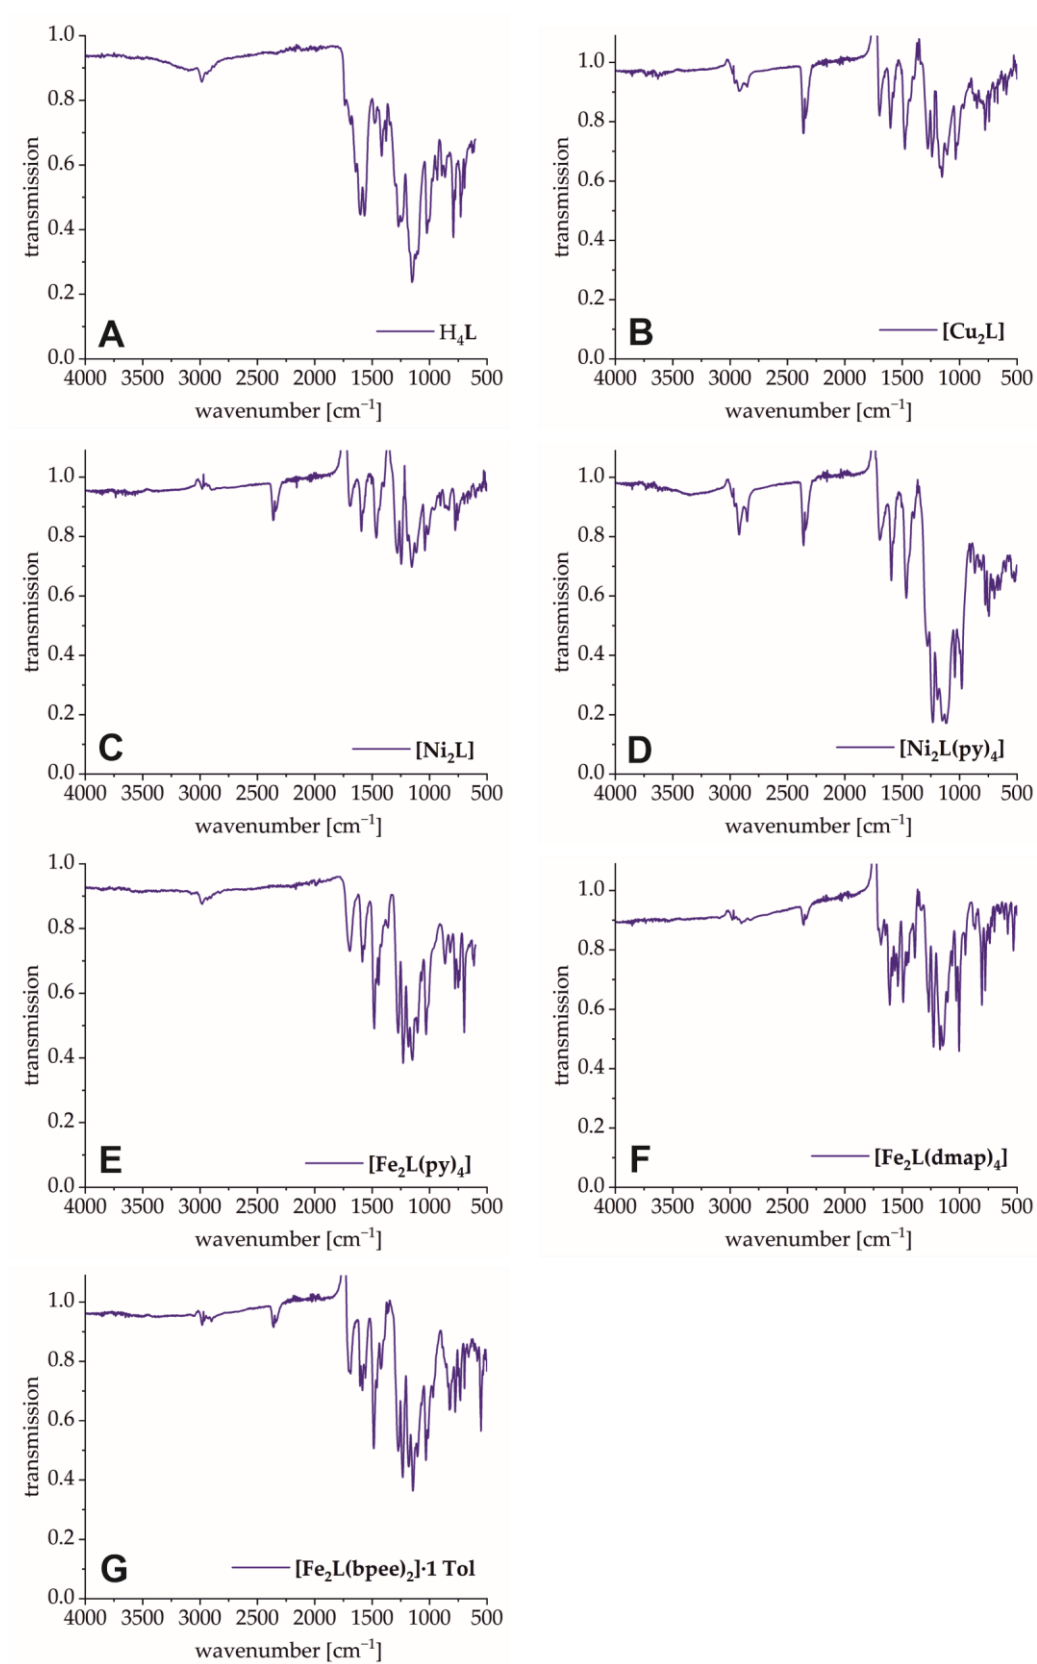

Figure S5: FT-IR spectrum of (A)  $\text{H}_4\text{L}$ , (B)  $[\text{Cu}_2\text{L}]$ , (C)  $[\text{Ni}_2\text{L}]$ , (D)  $[\text{Ni}_2\text{L}(\text{py})_4]$ , (E)  $[\text{Fe}_2\text{L}(\text{py})_4]$ , (F)  $[\text{Fe}_2\text{L}(\text{dmap})_4]$  and (G)  $[\text{Fe}_2\text{L}(\text{bpee})_2] \cdot 1 \text{ Tol}$ .

## Cystallographic data

Table S1: Crystallographic data of **[Ni<sub>2</sub>L(py)<sub>4</sub>]**.

| Compound                                                    | <b>[Ni<sub>2</sub>L(py)<sub>4</sub>]</b>                                                                                  |
|-------------------------------------------------------------|---------------------------------------------------------------------------------------------------------------------------|
| CCDC number                                                 | 2332706                                                                                                                   |
| Formula                                                     | C <sub>62</sub> H <sub>48</sub> F <sub>12</sub> N <sub>8</sub> Ni <sub>2</sub> O <sub>12</sub> S <sub>4</sub> [+ solvent] |
| Crystal size [mm]                                           | 0.054 × 0.051 × 0.041                                                                                                     |
| Crystal description                                         | Red platelet                                                                                                              |
| <i>M</i> [g mol <sup>-1</sup> ]                             | 1570.74                                                                                                                   |
| <i>T</i> [K]                                                | 180 K                                                                                                                     |
| $\lambda$ [nm]                                              | 0.71073                                                                                                                   |
| Crystal system                                              | tetragonal                                                                                                                |
| Space group                                                 | P4 <sub>2</sub>                                                                                                           |
| <i>a</i> [Å]                                                | 17.8926(3)                                                                                                                |
| <i>b</i> [Å]                                                | 17.8926(3)                                                                                                                |
| <i>c</i> [Å]                                                | 24.3239(5)                                                                                                                |
| $\alpha$ [°]                                                | 90.0                                                                                                                      |
| $\beta$ [°]                                                 | 90.0                                                                                                                      |
| $\gamma$ [°]                                                | 90.0                                                                                                                      |
| <i>V</i> [Å <sup>3</sup> ]                                  | 7787.2(3)                                                                                                                 |
| <i>Z</i>                                                    | 4                                                                                                                         |
| $\rho_{\text{calculated}}$ [mg cm <sup>-3</sup> ]           | 1.429                                                                                                                     |
| $\mu$ [mm <sup>-1</sup> ]                                   | 0.684                                                                                                                     |
| <i>F</i> (000)                                              | 3200                                                                                                                      |
| $\Theta_{\text{range}}$ [°]                                 | 1.8–29.0                                                                                                                  |
| Reflections collected                                       | 34757                                                                                                                     |
| Indep. reflections ( <i>R</i> <sub>int</sub> )              | 16403 (0.050)                                                                                                             |
| <i>R</i> 1                                                  | 0.0572                                                                                                                    |
| <i>wR</i> 2                                                 | 0.1447                                                                                                                    |
| GooF ( <i>S</i> )                                           | 0.938                                                                                                                     |
| Min. and Max. $\rho_{\text{residual}}$ [e Å <sup>-1</sup> ] | -0.40, 1.01                                                                                                               |

Table S2: Selected bond lengths and bond angles of  $[\text{Ni}_2\text{L}(\text{py})_4]$ .

| $[\text{Ni}_2\text{L}(\text{py})_4]$ |                 |                             |                 |
|--------------------------------------|-----------------|-----------------------------|-----------------|
|                                      | Bond length [Å] |                             | Bond angles [°] |
| d(Ni1–N1)                            | 1.991(7)        | $\angle(\text{N1–Ni1–O4})$  | 168.6(3)        |
| d(Ni1–N2)                            | 2.008(7)        | $\angle(\text{N2–Ni1–O3})$  | 172.7(2)        |
| d(Ni1–O3)                            | 2.020(5)        | $\angle(\text{N5–Ni1–N6})$  | 174.7(3)        |
| d(Ni1–O4)                            | 2.065(6)        | $\angle(\text{O3–Ni1–O4})$  | 100.6(2)        |
| d(Ni1–N5)                            | 2.117(7)        | $\angle(\text{N3–Ni2–O10})$ | 173.7(2)        |
| d(Ni1–N6)                            | 2.151(7)        | $\angle(\text{N4–Ni2–O9})$  | 173.8(3)        |
| d(Ni2–N3)                            | 1.961(6)        | $\angle(\text{N7–Ni2–N8})$  | 176.8(3)        |
| d(Ni2–N4)                            | 2.009(6)        | $\angle(\text{O9–Ni2–O10})$ | 96.1(2)         |
| d(Ni2–O9)                            | 2.010(6)        |                             |                 |
| d(Ni2–O10)                           | 2.039(5)        |                             |                 |
| d(Ni2–N7)                            | 2.139(7)        |                             |                 |
| d(Ni2–N8)                            | 2.198(7)        |                             |                 |
| d(C21–C22)                           | 1.345(11)       |                             |                 |

Table S3: Selected distances for short contact F...F interactions in  $[\text{Ni}_2\text{L}(\text{py})_4]$ .

|           | Distance [Å] |
|-----------|--------------|
| d(F2–F8)  | 2.867(8)     |
| d(F3–F12) | 2.839(7)     |
| d(F4–F11) | 2.784(9)     |

Table S4: Distances and angles of the aromatic interactions within  $[\text{Ni}_2\text{L}(\text{py})_4]$ . Cg(I) and Cg(J) are the centroids. Given are the angles between the ring planes, the perpendicular distance between the gravitational center and the respective ring as well as the slippage

| Cg(I)                             | Cg(J)                             | Cg(I)–Cg(J)<br>[Å] | $\alpha$ [°] | $\theta$ [°] | $\gamma$ [°] | Cg(I)-perp<br>[Å] | Cg(J)-perp<br>[Å] | Slippage<br>[Å] |
|-----------------------------------|-----------------------------------|--------------------|--------------|--------------|--------------|-------------------|-------------------|-----------------|
| S1 – C19 – C20 – S2 – C21         | N7 – C53 – C54 – C55 – C56 – C57  | 3.814(5)           | 16.1(4)      | 12.3         | 27.2         | 3.393(3)          | 3.726(4)          | 0.814           |
| S3 – C22 – S4 – C24 – C23         | N6 – C48 – C49 – C50 – C51 – C52  | 3.843(5)           | 17.8(4)      | 13.4         | 29.4         | 3.347(3)          | 3.739(4)          | 0.888           |
| N5 – C43 – C44 – C45 – C46 – C47  | N5 – C43 – C44 – C45 – C46 – C47  | 3.658(6)           | 11.5(5)      | 13.5         | 13.5         | 3.556(4)          | 3.557(4)          | 0.853           |
| N6 – C48 – C49 – C50 – C51 – C52  | S3 – C22 – S4 – C24 – C23         | 3.843(5)           | 17.8(4)      | 29.4         | 13.4         | 3.739(4)          | 3.347(3)          | 1.889           |
| N6 – C48 – C49 – C50 – C51 – C52  | C23 – C24 – C26 – C28 – C27 – C25 | 4.183(5)           | 18.9(4)      | 40.7         | 26.2         | 3.755(4)          | 3.171(3)          | 2.729           |
| N7 – C53 – C54 – C55 – C56 – C57  | S1 – C19 – C20 – S2 – C21         | 3.814(5)           | 16.1(4)      | 27.2         | 12.3         | 3.726(4)          | 3.393(3)          | 1.742           |
| N7 – C53 – C54 – C55 – C56 – C57  | C15 – C16 – C18 – C20 – C19 – C17 | 4.096(5)           | 17.6(4)      | 35.3         | 23.7         | 3.751(4)          | 3.344(3)          | 2.366           |
| N8 – C58 – C59 – C60 – C61 – C62  | N8 – C58 – C59 – C60 – C61 – C62  | 3.794(5)           | 18.4(4)      | 16.1         | 16.1         | 3.646(4)          | 3.645(4)          | 1.052           |
| C15 – C16 – C18 – C20 – C19 – C17 | N7 – C53 – C54 – C55 – C56 – C57  | 4.096(5)           | 17.6(4)      | 23.7         | 35.3         | 3.344(3)          | 3.750(4)          | 1.647           |
| C23 – C24 – C26 – C28 – C27 – C25 | N6 – C48 – C49 – C50 – C51 – C52  | 4.184(5)           | 18.9(4)      | 26.2         | 40.7         | 3.171(3)          | 3.756(4)          | 1.844           |

## DFT-Modelling frontier orbital pattern

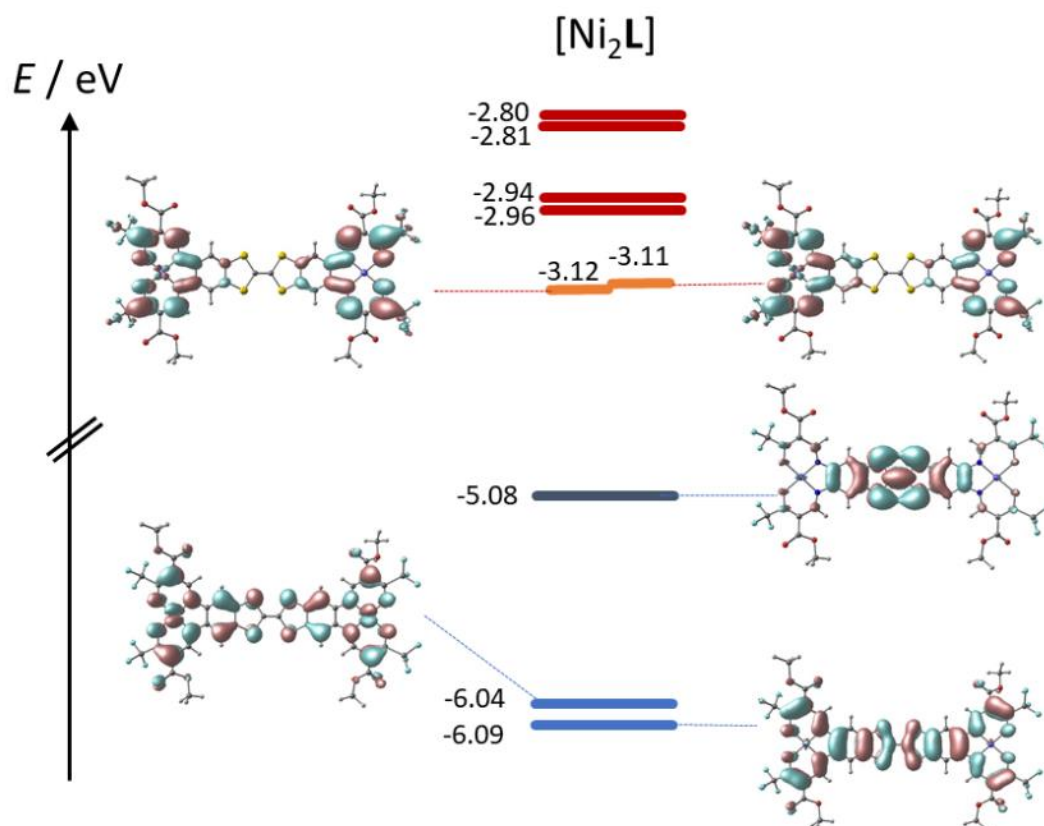Figure S6: Kohn-Sham frontier MO energy diagram and orbital plots of the binuclear nickel complex  $[\text{Ni}_2\text{L}]$ .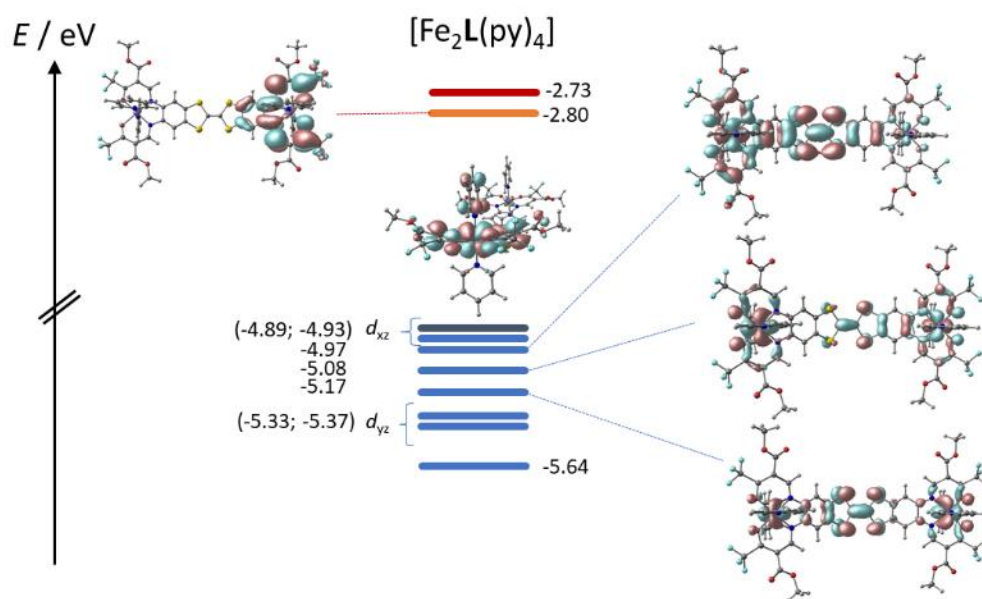Figure S7: Kohn-Sham frontier MO energy diagram and orbital plots of the binuclear iron complex  $[\text{Fe}_2\text{L}(\text{py})_4]$  (all-low spin).



## Thermogravimetric Analysis

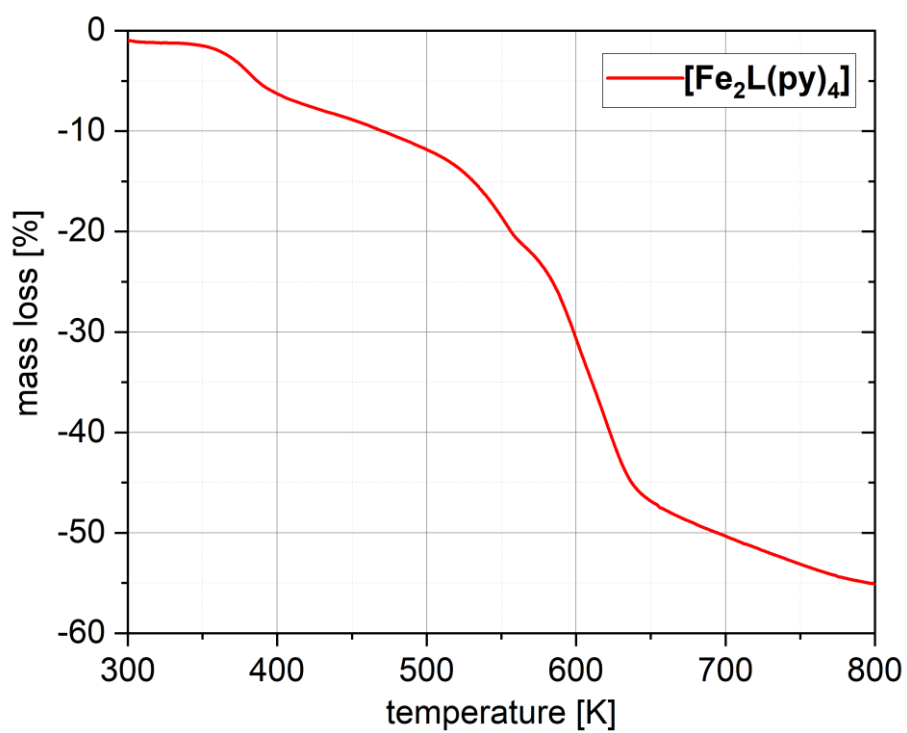Figure S8: Thermogravimetric analysis of  $[\text{Fe}_2\text{L}(\text{py})_4]$  under argon atmosphere.

## UV-Vis absorption spectra

Spectral deconvolutions of the UV-Vis absorption spectra of  $H_4L$ ,  $[Ni_2L]$ ,  $[Cu_2L]$  and  $[Fe_2L(py)_4]$  are shown in Figure S 13. It is noted that the fit procedure was model-free; that is, the fit was phenomenological with no *a priori* physical meaning. While overall red-shifted spectra prevail for all metal complexes, only the copper complex retains the overall spectral shape of the ligand spectrum. The long-wavelength band fits to a single Gaussian profile, which is red-shifted by  $2400\text{ cm}^{-1}$  with respect to the ligand spectrum. A very similar shift prevails for the near-UV band. The long-wave tailing of the strong Vis absorption in  $[Cu_2L]$  hides an additional, weak transition with a maximum at ca.  $15.000\text{ cm}^{-1}$ , which is readily identified as the  $d^9$  ligand-field absorption. In the case of nickel and iron the spectral shapes do no longer mimic the parent ligand spectrum. The long-wavelength band clearly consists of (at least) two strong individual transitions in both cases (in the fit, maxima are located at  $\nu = 20.700\text{ cm}^{-1}$  and  $\nu = 23.700\text{ cm}^{-1}$  and  $\nu = 21.500\text{ cm}^{-1}$  and  $\nu = 25.000\text{ cm}^{-1}$  for nickel and iron, respectively).

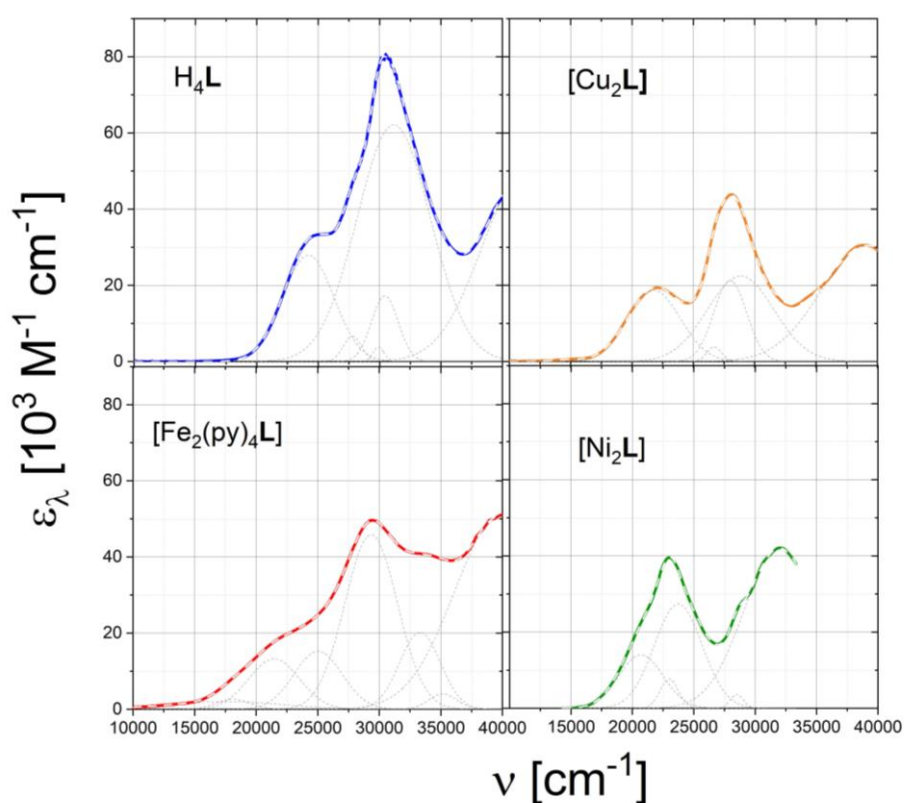

Figure S9: Gaussian deconvolution of the UV-Vis absorption spectra of  $H_4L$ ,  $[Ni_2L]$ ,  $[Cu_2L]$  and  $[Fe_2L(py)_4]$  (for Cu, the given molar absorption coefficients denote lower limits); colored line: exp. data; dotted: individual fit components; dashed: composite fit.

## Magnetic Properties

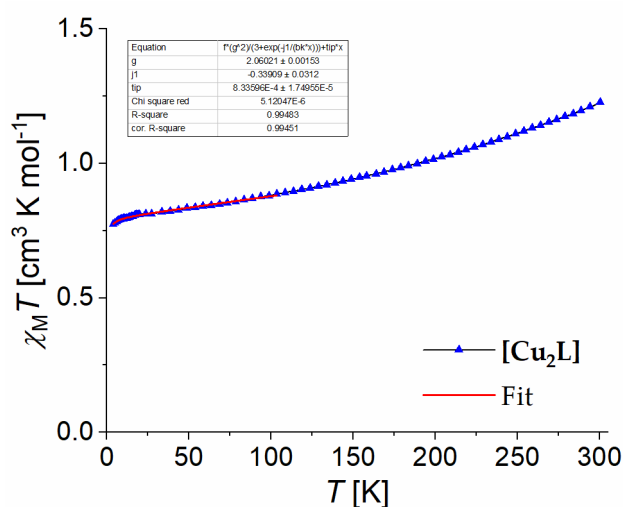Figure S10: Temperature dependence of  $\chi_M T$  of  $[\text{Cu}_2\text{L}]$ , including a fit to the coupling model of Bleaney-Bowers. $^{57}\text{Fe}$ -Mössbauer SpectroscopyTable S 5:  $^{57}\text{Fe}$  Mössbauer parameters for all iron compounds.

| Sample                                                                 | T [K]      | Site      | species    | $\delta$ [mm s <sup>-1</sup> ] | $\Delta E_Q$ [mm s <sup>-1</sup> ] | $\Gamma/2$ [mm s <sup>-1</sup> ] | Area [%] |
|------------------------------------------------------------------------|------------|-----------|------------|--------------------------------|------------------------------------|----------------------------------|----------|
| <b><math>[\text{Fe}_2\text{L}(\text{py})_4]</math></b>                 | 298        | D1        | Fe(II) HS  | 0.99(4)                        | 2.15(8)                            | 0.41(5)                          | 65(8)    |
|                                                                        |            | D2        | Fe(II) LS  | 0.31(7)                        | 1.19(15)                           | 0.43(11)                         | 35(8)    |
|                                                                        | 200        | D1        | Fe(II) HS  | 1.01(4)                        | 2.29(8)                            | 0.13(4)                          | 29(7)    |
|                                                                        |            | D2        | Fe(II) LS  | 0.40(2)                        | 1.20(5)                            | 0.17(3)                          | 71(8)    |
|                                                                        | 100        | D1        | Fe(II) HS  | 1.10(4)                        | 2.23(8)                            | 0.14(6)                          | 19(6)    |
|                                                                        |            | D2        | Fe(II) LS  | 0.430(10)                      | 1.132(19)                          | 0.154(14)                        | 81(5)    |
| 80                                                                     | D1         | Fe(II) HS | 1.104(13)  | 2.26(3)                        | 0.14(2)                            | 17.7(18)                         |          |
|                                                                        | D2         | Fe(II) LS | 0.435(3)   | 1.148(6)                       | 0.153(4)                           | 82.3(17)                         |          |
| <b><math>[\text{Fe}_2\text{L}(\text{py})_4]^{\text{heated}}</math></b> | 150        | D1        | Fe(II) HS  | 1.02(3)                        | 2.29(5)                            | 0.18(4)                          | 61(9)    |
|                                                                        |            | D2        | Fe(II) LS  | 0.42(4)                        | 1.27(9)                            | 0.13(6)                          | 25(14)   |
|                                                                        |            | D3        | Fe(III) HS | 0.41(6)                        | 0.73(16)                           | 0.13(11)                         | 14(13)   |
|                                                                        | 80         | D1        | Fe(II) HS  | 1.031(13)                      | 2.31(3)                            | 0.157(18)                        | 65(5)    |
|                                                                        |            | D2        | Fe(II) LS  | 0.42(3)                        | 1.30(8)                            | 0.14(5)                          | 22(12)   |
| D3                                                                     | Fe(III) HS | 0.43(4)   | 0.78(12)   | 0.13(8)                        | 13(11)                             |                                  |          |
| <b><math>[\text{Fe}_2\text{L}(\text{dmap})_4]</math></b>               | 150        | D1        | Fe(II) HS  | 1.12(4)                        | 2.29(8)                            | 0.16(6)                          | 24(6)    |
|                                                                        |            | D2        | Fe(II) LS  | 0.423(12)                      | 1.08(2)                            | 0.161(16)                        | 76(5)    |
|                                                                        | 80         | D1        | Fe(II) HS  | 1.189(8)                       | 2.305(17)                          | 0.148(13)                        | 15.5(10) |
|                                                                        |            | D2        | Fe(II) LS  | 0.4455(18)                     | 1.082(4)                           | 0.166(26)                        | 84.5(10) |
| <b><math>[\text{Fe}_2\text{L}(\text{bpee})_2]_n</math></b>             | 150        | D1        | Fe(II) HS  | 1.14(11)                       | 2.2(2)                             | 0.22(17)                         | 12(7)    |
|                                                                        |            | D2        | Fe(II) LS  | 0.407(10)                      | 1.131(18)                          | 0.166(14)                        | 88(6)    |
|                                                                        | 80         | D1        | Fe(II) HS  | 1.26(8)                        | 2.21(16)                           | 0.23(13)                         | 13(6)    |
|                                                                        |            | D2        | Fe(II) LS  | 0.424(7)                       | 1.109(13)                          | 0.156(10)                        | 87(5)    |

## Cyclic voltammograms

Table S 6: Measured half wave potentials  $E_{1/2}$  [V] and their corresponding peak-to-peak separations  $\Delta E$  [V] of the investigated samples.

| sample                                | solvent | $E_{1/2}^1$         | $E_{1/2}^2$ | $E_{1/2}^3$ | $E_{1/2}^4$ | $\Delta E^1$        | $\Delta E^2$ | $\Delta E^3$ | $\Delta E^4$ | $E^{1ox}$ | $E^{1red}$ | $E^{2ox}$ | $E^{2red}$ | $E^{3ox}$ | $E^{3red}$ | $E^{4ox}$ | $E^{4red}$ |
|---------------------------------------|---------|---------------------|-------------|-------------|-------------|---------------------|--------------|--------------|--------------|-----------|------------|-----------|------------|-----------|------------|-----------|------------|
| H <sub>4</sub> L                      | DCM     | 0.665 <sup>a)</sup> | 0.321       |             |             | 0.145 <sup>a)</sup> | 0.186        |              |              | 0.737     | 0.592      | 0.414     | 0.228      |           |            |           |            |
| [Ni <sub>2</sub> L]                   | DCM     | 0.697               | 0.263       |             |             | 0.087               | 0.067        |              |              | 0.740     | 0.653      | 0.296     | 0.229      |           |            |           |            |
| [Fe <sub>2</sub> L(py) <sub>4</sub> ] | DCM     |                     | 0.202       |             | 0.001       |                     | 0.150        |              | 0.220        | 0.616     | 0.278      | 0.128     | 0.182      |           |            | 0.111     | -0.109     |
| H <sub>4</sub> L                      | MeCN    | 0.578               | 0.300       |             |             | 0.189               | 0.105        |              |              | 0.672     | 0.483      | 0.352     | 0.247      |           |            |           |            |
| ox                                    | DCM     | 0.640               |             |             |             | 0.088               |              |              |              | 0.684     | 0.596      |           |            |           |            |           |            |

<sup>a)</sup>Appearance of two reduction peaks. Calculated  $E_{1/2}$  and  $\Delta E$  based on the first of two reduction peaks at 0.592 V.

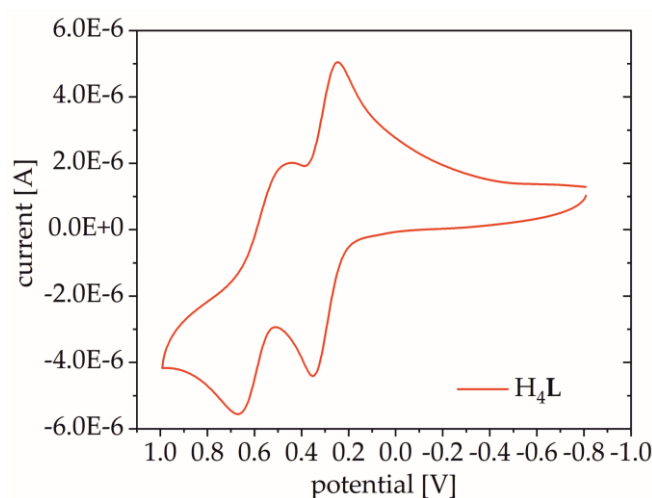

Figure S11: Cyclic voltammogram of a H<sub>4</sub>L; measured in MeCN ( $c = 1.0 \times 10^{-3}$  M) with NBu<sub>4</sub>PF<sub>6</sub> ( $c = 0.1$  M) on a platinum working and counter electrode with a saturated calomel reference electrode (SCE) and a scan rate of 50 mV s<sup>-1</sup>. Potentials are reported in reference to Fc/Fc<sup>+</sup>.

## Chemical oxidation

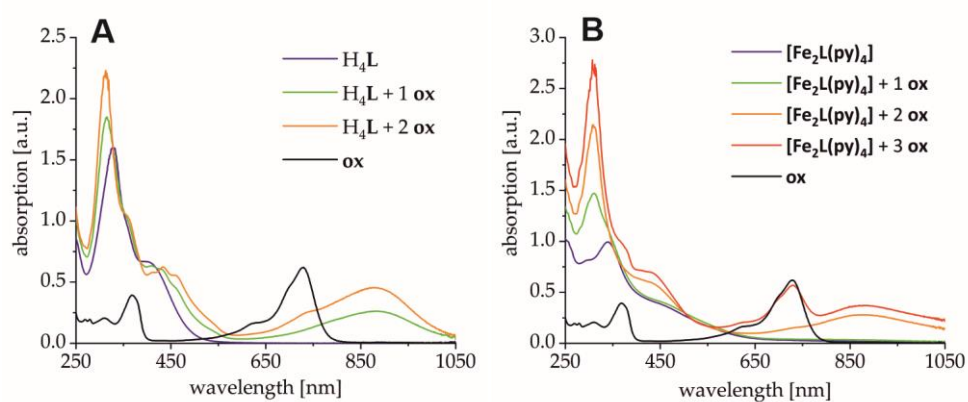

Figure S12: UV-Vis absorption spectra of (A) the ligand H<sub>4</sub>L and (B) [Fe<sub>2</sub>L(py)<sub>4</sub>] in DCM after addition of varying amounts of oxidation agent [N(C<sub>6</sub>H<sub>5</sub>Br-4)<sub>3</sub>]<sup>+</sup> [{3,5-(CF<sub>3</sub>)<sub>2</sub>C<sub>6</sub>H<sub>3</sub>}<sub>4</sub>B]<sup>-</sup> ox; ( $c = 2.0 \times 10^{-5}$  M).
